# Supplementary material
Source: PubMed Central journal article supplement (PMC7966488)
Supplement: 3621_table.pdf [file 3621_table.pdf]

**On-line Table: Predictors of thromboembolic and hemorrhagic complications occurring up to 6 months after treatment of cerebral aneurysms with the PED**

|                                                  | All Complications (%) | P Value <sup>a</sup> | Major Complications <sup>b</sup> (%) | P Value <sup>a</sup> |
|--------------------------------------------------|-----------------------|----------------------|--------------------------------------|----------------------|
| Sex                                              |                       | .42                  |                                      | 1                    |
| Female ( <i>n</i> = 38)                          | 10 (26.3)             |                      | 4 (10.5)                             |                      |
| Male ( <i>n</i> = 10)                            | 1 (10)                |                      | 1 (10)                               |                      |
| Age (yr)                                         |                       | .56                  |                                      | .42                  |
| 31–50 ( <i>n</i> = 12)                           | 2 (16.7)              |                      | 1 (8.3)                              |                      |
| 51–65 ( <i>n</i> = 21)                           | 4 (19)                |                      | 1 (4.8)                              |                      |
| 66–81 ( <i>n</i> = 15)                           | 5 (33.3)              |                      | 3 (20)                               |                      |
| Smoking history                                  |                       | .91                  |                                      | .72                  |
| Never ( <i>n</i> = 14)                           | 3 (21.4)              |                      | 2 (14.3)                             |                      |
| Former <sup>c</sup> ( <i>n</i> = 16)             | 3 (18.8)              |                      | 2 (12.5)                             |                      |
| Active ( <i>n</i> = 18)                          | 5 (27.8)              |                      | 1 (5.6)                              |                      |
| History of hypertension ( <i>n</i> = 26)         | 8 (30.8)              | .19                  | 4 (15.4)                             | .36                  |
| Aspirin dose                                     |                       | 1                    |                                      | 1                    |
| 81 mg ( <i>n</i> = 6)                            | 1 (16.7)              |                      | 1 (16.7)                             |                      |
| 325 mg ( <i>n</i> = 42)                          | 10 (23.8)             |                      | 4 (9.5)                              |                      |
| Final P2Y12 receptor antagonist                  |                       | 1                    |                                      | .7                   |
| Clopidogrel ( <i>n</i> = 32)                     | 8 (25)                |                      | 3 (9.4)                              |                      |
| Prasugrel ( <i>n</i> = 14)                       | 3 (21.4)              |                      | 2 (14.3)                             |                      |
| Ticagrelor ( <i>n</i> = 2)                       | 0                     |                      | 0                                    |                      |
| Last-recorded PRU value                          |                       | <.001 <sup>d</sup>   |                                      | .01 <sup>d</sup>     |
| <60 ( <i>n</i> = 9)                              | 5 (55.6)              |                      | 3 (33.3)                             |                      |
| 60–240 ( <i>n</i> = 37)                          | 4 (10.8)              |                      | 1 (2.7)                              |                      |
| >240 ( <i>n</i> = 2)                             | 2 (100)               |                      | 1 (50)                               |                      |
| Postprocedural corticosteroids                   |                       | .17                  |                                      | .19                  |
| None ( <i>n</i> = 3)                             | 2 (66.7)              |                      | 1 (33.3)                             |                      |
| Methylprednisolone ( <i>n</i> = 32)              | 6 (18.8)              |                      | 2 (6.3)                              |                      |
| Dexamethasone ( <i>n</i> = 13)                   | 3 (23.1)              |                      | 2 (15.4)                             |                      |
| Distal access catheter                           |                       | 1                    |                                      | 1                    |
| ReFlex ( <i>n</i> = 25)                          | 6 (24)                |                      | 3 (12)                               |                      |
| Neuron ( <i>n</i> = 23)                          | 5 (21.7)              |                      | 2 (8.7)                              |                      |
| Microwire                                        |                       | .63                  |                                      | .6                   |
| Headliner ( <i>n</i> = 35)                       | 7 (20)                |                      | 4 (11.4)                             |                      |
| Traxcess ( <i>n</i> = 7)                         | 2 (28.6)              |                      | 0                                    |                      |
| Avigo ( <i>n</i> = 6)                            | 2 (33.3)              |                      | 1 (16.7)                             |                      |
| Aneurysm location <sup>e</sup>                   |                       | 1                    |                                      | 1                    |
| ICA ( <i>n</i> = 35)                             | 8 (22.9)              |                      | 4 (11.4)                             |                      |
| ACA/MCA ( <i>n</i> = 8)                          | 2 (25)                |                      | 1 (12.5)                             |                      |
| Posterior circulation ( <i>n</i> = 5)            | 1 (20)                |                      | 0                                    |                      |
| Maximum aneurysm size <sup>e</sup>               |                       | .38                  |                                      | .72                  |
| <5 mm ( <i>n</i> = 15)                           | 4 (26.7)              |                      | 1 (6.7)                              |                      |
| ≥5 and <10 mm ( <i>n</i> = 13)                   | 1 (7.7)               |                      | 1 (7.7)                              |                      |
| ≥10 mm ( <i>n</i> = 20)                          | 6 (30)                |                      | 3 (15)                               |                      |
| Wide-neck (≥4 mm) <sup>e</sup> ( <i>n</i> = 29)  | 7 (24.1)              | 1                    | 3 (10.3)                             | 1                    |
| Fusiform morphology <sup>e</sup> ( <i>n</i> = 7) | 3 (42.9)              | .33                  | 2 (28.6)                             | .15                  |
| Vessel from neck/sac ( <i>n</i> = 26)            | 5 (19.2)              | .73                  | 1 (3.9)                              | .16                  |
| Number of PEDs deployed                          |                       | .42                  |                                      | .07                  |
| 1 ( <i>n</i> = 37)                               | 7 (18.9)              |                      | 2 (5.4)                              |                      |
| >1 ( <i>n</i> = 11)                              | 4 (36.7)              |                      | 3 (27.3)                             |                      |
| Technically difficult procedure ( <i>n</i> = 17) | 7 (41.2)              | .036                 | 3 (17.6)                             | .33                  |

**Note:**—ACA indicates anterior cerebral artery.

<sup>a</sup> For univariate analysis with  $\chi^2$  or Fisher exact test.

<sup>b</sup> Resulting in death or permanent disabling neurologic deficit.

<sup>c</sup> Ceased smoking >6 months before procedure.

<sup>d</sup> Independent predictor in multivariate regression analysis ( $P \leq .05$ ).

<sup>e</sup> For largest aneurysm treated.
